# Supplementary material for: The Power of LC-MS Based Multiomics: Exploring Adipogenic Differentiation of Human Mesenchymal Stem/Stromal Cells
Source: Preprints.org preprint supplement (doi:10.20944/preprints201909.0017.v1), 2019-09-02
Supplement: Supplementary file 1 [file EnrichmentPathways_OmisNet_S2.xlsx]

## Sheet: Subnetwork1
Pathway	Total	Expected	Hits	P.Value	FDR
Purine metabolism	163	30.5	122	5.05e-57	1.1e-54
Glycerophospholipid metabolism	82	15.4	62	1.82e-29	1.98e-27
GnRH signaling pathway	94	17.6	62	3.87e-24	2.8e-22
Arginine and proline metabolism	56	10.5	43	3.49e-21	1.89e-19
Fc epsilon RI signaling pathway	75	14.1	48	4.25e-18	1.84e-16
Alanine, aspartate and glutamate metabolism	32	6	28	5.04e-17	1.82e-15
Pyrimidine metabolism	101	18.9	54	2.54e-15	7.88e-14
Ether lipid metabolism	35	6.56	28	5.27e-15	1.39e-13
Glycine, serine and threonine metabolism	33	6.18	27	5.77e-15	1.39e-13
Progesterone-mediated oocyte maturation	80	15	46	8.13e-15	1.77e-13
Glycolysis / Gluconeogenesis	65	12.2	40	2e-14	3.9e-13
Nicotinate and nicotinamide metabolism	26	4.87	23	2.16e-14	3.9e-13
Sphingolipid metabolism	46	8.62	32	5.33e-14	8.89e-13
VEGF signaling pathway	76	14.2	43	1.38e-13	2.13e-12
Vascular smooth muscle contraction	109	20.4	53	7.49e-13	1.08e-11
Lysine degradation	47	8.81	31	1.25e-12	1.69e-11
ErbB signaling pathway	87	16.3	44	1.3e-11	1.66e-10
Pentose phosphate pathway	27	5.06	20	5.52e-10	6.65e-09
Neurotrophin signaling pathway	123	23	52	8.51e-10	9.34e-09
Amino sugar and nucleotide sugar metabolism	45	8.43	27	8.76e-10	9.34e-09
MAPK signaling pathway	265	49.7	90	9.04e-10	9.34e-09
alpha-Linolenic acid metabolism	21	3.94	17	1.06e-09	1.05e-08
Fc gamma R-mediated phagocytosis	97	18.2	44	1.21e-09	1.14e-08
Insulin signaling pathway	137	25.7	55	2.74e-09	2.42e-08
Fructose and mannose metabolism	36	6.75	23	2.78e-09	2.42e-08
Long-term depression	70	13.1	34	1.12e-08	9.37e-08
Cysteine and methionine metabolism	34	6.37	21	3.34e-08	2.68e-07
mTOR signaling pathway	45	8.43	24	1.78e-07	1.38e-06
Phosphatidylinositol signaling system	75	14.1	33	3.61e-07	2.7e-06
Riboflavin metabolism	11	2.06	10	4.68e-07	3.39e-06
Inositol phosphate metabolism	58	10.9	27	1.09e-06	7.62e-06
Influenza A	107	20.1	41	1.31e-06	8.9e-06
Salivary secretion	49	9.18	24	1.38e-06	9.07e-06
Linoleic acid metabolism	29	5.43	17	2.01e-06	1.28e-05
Gap junction	89	16.7	35	3.95e-06	2.45e-05
Glioma	65	12.2	28	4.65e-06	2.81e-05
Glycerolipid metabolism	52	9.74	24	5.23e-06	3.06e-05
Glutamatergic synapse	101	18.9	38	5.37e-06	3.07e-05
T cell receptor signaling pathway	98	18.4	37	6.5e-06	3.62e-05
Galactose metabolism	26	4.87	15	1.07e-05	5.83e-05
Taurine and hypotaurine metabolism	9	1.69	8	1.11e-05	5.89e-05
Type II diabetes mellitus	48	8.99	22	1.49e-05	7.68e-05
Tyrosine metabolism	33	6.18	17	2.11e-05	0.000107
Retrograde endocannabinoid signaling	60	11.2	25	3.02e-05	0.000148
Fatty acid metabolism	40	7.5	19	3.06e-05	0.000148
Bile secretion	29	5.43	15	6.13e-05	0.000283
Bladder cancer	29	5.43	15	6.13e-05	0.000283
Non-small cell lung cancer	52	9.74	22	6.83e-05	0.000309
Adipocytokine signaling pathway	63	11.8	25	7.98e-05	0.000354
Gastric acid secretion	56	10.5	23	8.19e-05	0.000355
Pancreatic secretion	30	5.62	15	0.000102	0.000432
Acute myeloid leukemia	57	10.7	23	0.000113	0.000473
Epstein-Barr virus infection	91	17.1	32	0.000136	0.000557
Cholinergic synapse	95	17.8	33	0.000141	0.000565
Pancreatic cancer	69	12.9	26	0.000159	0.000629
Hepatitis C	100	18.7	34	0.00018	0.000699
Phenylalanine, tyrosine and tryptophan biosynthesis	5	0.937	5	0.000229	0.000872
Proximal tubule bicarbonate reclamation	7	1.31	6	0.000251	0.00094
RIG-I-like receptor signaling pathway	49	9.18	20	0.000262	0.000964
Tryptophan metabolism	39	7.31	17	0.000297	0.00107
Selenocompound metabolism	12	2.25	8	0.000357	0.00127
Epithelial cell signaling in Helicobacter pylori infection	37	6.93	16	0.000498	0.00174
Endometrial cancer	44	8.25	18	0.000511	0.00176
Long-term potentiation	70	13.1	25	0.000552	0.00187
Colorectal cancer	49	9.18	19	0.000797	0.00266
Propanoate metabolism	22	4.12	11	0.000877	0.00288
Oocyte meiosis	108	20.2	34	0.000901	0.00289
Vibrio cholerae infection	19	3.56	10	0.000907	0.00289
Histidine metabolism	26	4.87	12	0.00126	0.00396
Folate biosynthesis	14	2.62	8	0.00152	0.0047
Prostate cancer	87	16.3	28	0.00172	0.00527
Renal cell carcinoma	60	11.2	21	0.00201	0.00606
Serotonergic synapse	88	16.5	28	0.00209	0.00621
Pantothenate and CoA biosynthesis	15	2.81	8	0.00272	0.00797
Calcium signaling pathway	177	33.2	48	0.0034	0.0098
Aminoacyl-tRNA biosynthesis	7	1.31	5	0.00343	0.0098
Endocrine and other factor-regulated calcium reabsorption	36	6.75	14	0.00371	0.0105
Arachidonic acid metabolism	63	11.8	21	0.00394	0.011
One carbon pool by folate	19	3.56	9	0.00416	0.0114
beta-Alanine metabolism	26	4.87	11	0.00463	0.0124
Glycosphingolipid biosynthesis - lacto and neolacto series	26	4.87	11	0.00463	0.0124
Melanoma	68	12.7	22	0.00484	0.0128
Pyruvate metabolism	41	7.68	15	0.00533	0.0139
Osteoclast differentiation	119	22.3	34	0.00538	0.0139
Morphine addiction	55	10.3	18	0.00907	0.0232
Prion diseases	21	3.94	9	0.00926	0.0234
Toll-like receptor signaling pathway	97	18.2	28	0.00947	0.0236
Toxoplasmosis	93	17.4	27	0.0099	0.0244
Butanoate metabolism	25	4.68	10	0.0109	0.0262
Carbohydrate digestion and absorption	18	3.37	8	0.0109	0.0262
Chronic myeloid leukemia	73	13.7	22	0.0121	0.0287
Chemokine signaling pathway	189	35.4	48	0.0128	0.0302
Starch and sucrose metabolism	53	9.93	17	0.0137	0.0319
Melanogenesis	101	18.9	28	0.0166	0.0384
Chagas disease (American trypanosomiasis)	89	16.7	25	0.0194	0.0444
Valine, leucine and isoleucine degradation	44	8.25	14	0.0258	0.0579
Axon guidance	118	22.1	31	0.0259	0.0579
Lysine biosynthesis	2	0.375	2	0.0351	0.0777
Aldosterone-regulated sodium reabsorption	34	6.37	11	0.0406	0.0889
N-Glycan biosynthesis	43	8.06	13	0.0463	0.0999
HTLV-I infection	199	37.3	47	0.0465	0.0999

## Sheet: Subnetwork2
Pathway	Total	Expected	Hits	P.Value	FDR
Glycerolipid metabolism	52	0.167	13	8.05e-25	1.75e-22
Fat digestion and absorption	9	0.0288	4	8.53e-09	9.26e-07
Steroid biosynthesis	18	0.0577	1	0.0562	1
Alzheimer's disease	49	0.157	1	0.146	1
PPAR signaling pathway	64	0.205	1	0.187	1
Retinol metabolism	66	0.212	1	0.192	1
Insulin signaling pathway	137	0.439	1	0.36	1

## Sheet: Subnetwork3
Pathway	Total	Expected	Hits	P.Value	FDR
Glutathione metabolism	46	0.0885	9	3.74e-19	8.12e-17
Arachidonic acid metabolism	63	0.121	6	3.8e-10	4.13e-08

## Sheet: Subnetwork4
Pathway	Total	Expected	Hits	P.Value	FDR
Fatty acid metabolism	40	0.0342	4	4.58e-09	9.93e-07
PPAR signaling pathway	64	0.0547	4	3.18e-08	3.45e-06
Adipocytokine signaling pathway	63	0.0538	3	9.21e-06	0.000667
