# Supplementary material for: The Power of LC-MS Based Multiomics: Exploring Adipogenic Differentiation of Human Mesenchymal Stem/Stromal Cells
Source: Preprints.org preprint supplement (doi:10.20944/preprints201909.0017.v1), 2019-09-02
Supplement: Supplementary file 2 [file Protein_MetaboliteLipidList_S1.xlsx]

## Sheet: Proteins
	MSC0	MSC21
A0A087WZZ9	112445	52121.5
A0A024R0T9	1637250	0
A0A024R4E5	27711500	14498000
A0A024R4M0	8204000	9576250
A0A024R571	600980	419095
A0A024R6I7	15287500	14184000
A0A024RA52	4650950	3427400
A0A024RBT2	186450	264515
A0A075B797	108872	0
A0A075B6K5	462985	281790
A0A087X0Q4	850910	0
A0A075B7B8	0	339090
E9PKG6	1839750	654335
E9PIR7	2311150	7384150
A0A087WT59	909005	557960
A0A087WTA8	20251500	11179150
F5H5N1	92893.5	0
A0A087WTJ8	0	1012195
F8W1I4	156645	0
A0A087WTZ5	658825	610495
A0A087WU03	373400	317635
A0A087WUB9	74876.5	39924
A0A087WUK2	7817600	4584350
A0A087WXQ8	805270	619385
A0A087WUQ6	1400800	1119335
E7ETK0	4935750	4158800
A0A087WUT6	220675	137504
A0A087WUZ3	3490250	4383850
A0A087WV05	456285	0
A0A087WV46	0	34970.5
E5RGS7	589405	301655
A0A087WVQ6	24467500	25886000
A0A087WVV2	29442500	22326000
A0A087WVZ3	0	0
A0A087WW40	286545	186550
A0A087WW66	2542500	2959650
A0A087WWJ1	16889.5	0
A0A087WWU8	12160500	12709500
A0A087WX58	411800	49430.5
A0A087WXI7	40103.5	509065
A0A087WXM6	17732000	14202000
A0A087WY55	576275	0
A0A087WY61	491065	143008
A0A087WY71	375995	612640
D6RFM0	1773150	975400
A0A087WYR3	5326950	1823955
A0A087WYS1	6667500	13694000
A0A087WYT3	6670300	441810
A0A087WYX9	182680	63924
C9JXK9	777205	960985
A0A087X2E5	400880	698915
H0YJV3	143450	206850
A0A087X020	1677500	1235920
A0A087X054	14157000	13784000
A0A087X0K9	565260	182862
A0A087X0S5	55006000	47013000
G3V4F2	353778	2063300
Q5W0J0	81499	194950
Q5JW28	403395	530860
A0A087X1G7	816755	689340
A0A087X1K9	536865	478745
J3QT95	50083	42766.5
D6RF16	123920	0
A0A087X1Z3	2368700	1115300
A0A087X2B5	1992100	3803500
A0A087X2D0	7707150	0
A0A087X2D5	142565	116262
H0YJC0	1805900	983430
A0A087X2I5	0	243485
A0A096LNJ1	394830	871285
C9JFE4	201655	160690
A2A2L5	257760	0
A8MY87	0	896995
A0A0A0MR02	9226700	16898500
Q5T093	24993.5	52540
E7EQ12	415105	334360
A0A0A0MR50	0	0
A0A0A0MRA3	1764950	1863100
M0R3F1	853350	566235
A8K968	1687650	943235
H7C0V9	0	625580
K7ERN7	54255	0
A0A0A0MRI2	203975	182915
A0A0A0MRJ6	1771050	1646800
F8W895	0	0
A0A0A0MRM9	516785	99744
E2QRN4	26361.5	15600
A0A0A0MRR7	347765	673505
A0A0A0MS08	62263000	44277500
A0A0A0MS51	24465000	23478500
A0A1W2PNM1	987245	3855450
J3KNW4	2460650	3341050
A0A0A0MSQ0	8796150	7887550
A0A0A0MSS8	749630	2926000
A0A0A0MSV6	83045	350875
E9PKD2	192525	126265
B3KYB7	847390	440455
A0A0A0MTR6	489315	885100
A0A0A0MT32	249360	294295
E9PMP7	201965	206610
A0A0A0MTH3	1515650	1514390
B8ZWD1	1761400	3832000
F5H6Q7	0	0
A0A0A0MTS2	8254600	10963850
A0A0A6YYA0	1016845	1529200
A0A0A6YYJ8	883495	144904
A0A0C4DH42	1326750	853745
A0A0B4J1Z1	4105600	390700
A0A0B4J210	339095	152964
A0A0B4J231	23643000	17861000
A0A0B4J2A4	2405150	2912650
S4R460	1165410	817820
Q5W0H4	15292000	11737450
A0A0C4DFV9	9011000	2334255
F8W954	57075.5	0
A0A0C4DFZ2	211010	241845
C9J9K3	27423500	22228000
D6RJA6	0	0
A0A0C4DGA2	39569	0
A0A0C4DGQ5	6922950	3629600
A0A0C4DGX4	138510	0
A0A0C4DGY8	0	0
A0A0C4DH31	304570	324200
A0A0D9SEM4	0	0
A0A0D9SFB3	7567800	2773000
A0A0D9SF63	398030	213575
A0A0D9SFI9	416665	401795
Q5JRC6	60205.5	0
A0A0G2JHC2	773355	161390
A0A0G2JIW1	15012500	21032500
F5GXS0	3455050	3373850
A0A0G2JM88	0	0
A0A0G2JMB2	350790	351070
A0A0J9YYL3	2649250	1090225
A0A0J9YW13	0	0
C9JPV4	136018	681310
E9PLH9	398130	268040
C9JDR7	159049	0
A0A0J9YXC7	1357450	1734850
A0A0J9YXN7	75596	6791650
A0A0R4J2E8	8968300	4041250
A0A0S2Z4G6	2178150	2606850
A0A0U1RQF0	28620500	70121000
A0A0U1RQH7	1021755	641385
A0A0U1RQQ4	0	387040
A0A0U1RR32	14260850	11535600
A0A0U1RRM4	12523000	6478650
A0A0U1RRM8	1270280	1992850
A0A2R8Y4D1	4705850	0
A0A1B0GTY1	415295	322315
A0A1B0GUA1	972075	2844000
A0A1B0GWJ0	214175	147870
A0A1B0GV63	314280	404780
A0A1B0GTU4	1828550	0
A0A3B3ISZ5	0	0
H7C469	2927800	7199300
A0A1B0GUU9	10557400	9949300
A0A1B0GVN9	1358150	790450
I3L276	0	319285
A0A1C7CYX9	15979500	27675500
A0A1W2PNV4	5200800	5595750
D6RDG0	174025	631075
A0A1W2PNX8	100338	97369.5
A0A1W2PPH1	1392850	1987400
A0A1W2PPS1	25125000	18573500
A0A1W2PRL9	397585	0
A0A1W2PQ43	481220	124676
A0A1X7SBZ2	4207300	1989800
J3KTD2	1221995	0
A0A1W2PQV2	314002	611300
A0A1W2PRD7	80271.5	81593
A0A1W2PSA2	1312400	0
A0A286YES1	757190	321380
A0A286YEY1	20210000	14539500
A0A286YEY4	6516300	5033550
A0A286YF22	2241400	2647600
E9PSE5	0	0
A0A286YFJ8	12866500	9079900
A0A2Q2TTZ9	817485	548825
A0A2R8Y4D6	209415	0
A0A2R8Y897	95841.5	107927
A0A2R8Y7F8	1309700	0
A0A2R8Y804	183375	174115
A0A2R8Y6Z6	98573	0
F8W0B5	79411	74686
A0A2R8YEY5	164015	109308
A0A2R8Y6S1	0	1107580
A0A2R8Y6J3	21805500	15812500
A0A2R8YDQ9	241683	735415
E7EX53	8586400	7441450
A0A2R8Y7C0	1514100	1037115
A0A2R8Y7U1	635590	978720
A0A2R8Y811	9173700	6351550
E7ER27	679960	1517800
A0A2R8YDA8	339015	626625
A0A2R8YDT1	0	851330
E9PNW4	1415370	3441600
A0A3B3IRI2	965570	515705
A0A3B3IRL5	7103000	9155900
F8VUY7	0	15114
C9J3L8	3918650	2546050
H7C4A3	49677	324555
A0A3B3IS06	535860	481740
A0A3B3IT15	4528050	4544100
H0YNU5	1437600	0
A0A3B3IU45	1180990	464870
A0A3B3ITF0	313140	125689
M0QXS5	9016450	7074350
A0A3B3ITK7	2082450	2764900
A0A3B3ITS0	0	584090
A0A3B3ITT5	3969350	3599250
A0A3B3ITZ9	2037950	301857
B1AHD1	1083315	1310550
A0A3B3IUA7	586310	881175
A0AVT1	519265	308670
A2A274	2299150	5012650
A2A2D0	1000495	0
Q4TT37	0	0
H3BTL1	253205	262265
A6NDG6	234515	0
A6NL93	138796	183815
A6NEM2	0	0
A6NFX8	1796300	950295
K7EIN1	120662	0
H3BMT0	478265	326950
A6NHQ2	528760	0
A6NJA2	697985	460705
A6NKL6	0	0
A6NLM8	2587700	2697450
E9PJK1	451445	709900
C9JH92	202830	145776
A6PVN8	147004	179995
A7XZE4	2190400	2039750
A8K878	4412150	9911000
A8MUA9	3235750	6439250
A8MUH2	607075	656200
H7BY10	7613200	5854500
Q49AN9	507940	403345
C9JN83	0	0
A8MZF9	0	183753
A9Z1X7	1150645	0
F8WB30	563880	852525
B0QY89	1755900	875275
B0QYK0	3263600	1624250
F2Z2V0	1198305	1354550
B0QZ77	0	16918
B0QZK4	842985	0
B0YIW2	3856350	2410350
B0YIW6	3811400	2299750
B1AHB1	898910	120847
B1AKG0	158920	84735
F5H7V1	350110	250035
B1ALA9	2472600	1084605
B1ALD9	6485000	183565
B1ANR0	1544600	1483500
G3V4W0	874205	0
B3KS98	168510	160285
E9PPM9	337625	399450
B4DDD6	2319250	1595450
B4DEM9	0	136230
B4DFG0	1024240	0
B4DIH5	149794	0
B4DJ81	839390	884145
B4DJV2	1177655	1999500
B4DJV5	0	0
B4DLR8	73828	74306.5
G8JLI2	1372720	2153500
B4DUC8	1139130	891080
B4DUT8	9703400	7028950
E7EU85	325220	236165
B4DY09	3959650	2837900
F8W1Z8	273370	215560
C9JDH9	65166.5	0
B4E1N1	244705	159992
E7ETN3	500765	857755
B5MD17	412245	337535
B5MDF5	17917000	10816850
Q99613	2305000	991285
F5H3S6	83560	110759
D6RER0	0	733710
B7Z645	0	0
K7ESJ2	522655	719680
B7Z9I1	669560	1065825
B8ZZC5	792965	1919350
B8ZZJ0	283130	151275
B8ZZK2	1075370	964745
B8ZZQ6	4792500	2523600
B8ZZU9	78187	0
C9J2I0	316045	0
B9A057	0	0
B9A067	1051715	3335050
C9IZ83	0	76470.5
C9J050	855810	563000
C9J0D1	236210	68562.5
C9J0I9	0	31020
C9J0K6	3507850	3554900
C9J2Y4	0	0
C9J4Z3	3231250	2769250
E9PFH4	0	74680.5
C9J8H1	0	290985
C9J8P9	2067050	1045410
C9JA05	328605	235950
C9JAW5	196317	0
C9JAZ1	335220	751605
C9JBL3	0	479145
E9PMW2	0	0
E9PPU6	561170	365225
C9JEY1	989935	1351350
C9JFR7	3880450	7770600
C9JG87	0	0
C9JGI3	485390	557465
C9JLK2	435475	572205
C9JIG9	0	214655
C9JIZ6	3685100	2952150
C9JJ19	131814	0
C9JJ34	4525900	2605400
C9JKI3	1248630	1035520
C9JL41	253025	34310
C9JL85	2902950	2623300
C9JLI6	1067525	828390
C9JLU1	478265	363305
F2Z2Y6	583745	366005
C9JXB8	8874000	7689600
C9JP16	2681100	4207400
G5E9W8	0	828445
C9JRZ6	939145	2440700
C9JTN7	156135	80018
C9JUG7	646800	877880
C9JV77	3165800	12600500
C9JVY5	44852.6	716815
C9JYQ9	4065200	0
C9JZR2	796005	565980
K7EN66	272845	225160
G3V1N2	1860100	367385
P02533	2422800	3873000
P02538	2075150	9585700
P02768	410135000	297490000
P05787	1328175	0
P08729	0	0
P08779	3998150	9300350
P13645	107271000	131285000
P13647	628550	1908700
P10451	0	269405
P35527	60409000	57092500
P35908	42901000	31300000
H0Y3P2	728885	503850
D3YTB1	5758600	6906800
H0Y9C2	798190	1460600
D6R967	168722	351355
D6R9P3	2163400	2191250
D6RAN6	410395	0
D6RF20	542655	416635
D6RBW1	1458600	0
D6RC45	128538	106420
D6RC52	354135	673545
D6REP8	2126550	2447000
D6REB4	0	439385
D6RGI3	6629600	6852800
D6REX3	9936850	5858650
S4R2X2	101084	338465
D6RFM5	1148970	2705950
D6RG15	1755650	1204835
D6RGG3	46439.5	252745
D6RIE3	369055	310275
D6RJ96	0	179800
D6RJD1	373960	584230
K7EQX4	1080010	1154850
J3QKT4	730040	478060
E5RFG2	0	0
E5RJT5	427705	0
E5RFX7	175380	139510
E5RH52	333210	0
E5RGS5	250685	244205
E5RGX7	205965	0
E5RJW4	269580	0
E5RHF4	304315	0
E5RHG8	977295	773550
E5RI99	6727800	6307050
E5RIP4	0	0
J3QRI7	5379150	4494550
H0YBA0	0	62049.5
E5RK64	356295	475360
E5RK69	186060	607525
E7EM64	991190	848425
E7EN77	0	0
H7BYX9	0	473880
E7EPB3	703010	779950
E7EPG1	0	298605
E7ES33	7763250	7446250
E7EPN9	121717	0
E7EPT4	226525	286690
E7EQ69	0	0
E7EQR4	2250100	397310
G3V3B0	284615	0
H7C2I4	82203.5	41008.5
E7ETC2	622655	657755
E7ETU5	390150	382500
E9PF06	0	118554
E7ETZ4	945045	243159
E7EX73	4078350	4263150
E7EVA0	14617500	7909800
G5E9S8	1288600	1081500
E7EVQ5	404525	483630
E9PID8	152410	97899
E7EX17	1364600	1119010
E9PGZ1	32916000	43706500
E7EX90	1401795	1585600
F8VZJ2	10182150	2642150
E9PB51	349510	0
E9PBT8	346830	706385
H0YAF7	221230	207690
E9PDF6	1036900	452680
E9PDQ8	750100	1125415
E9PE85	172480	0
E9PEB5	5146300	2622350
E9PF16	0	204090
Q14DU5	133728	217960
E9PFD2	270450	225822
E9PFN5	0	0
E9PFP8	578030	0
H0Y8C4	0	0
E9PGC8	1435250	0
H9KV48	774375	662460
E9PGT6	997570	565395
E9PH64	0	251180
E9PHI6	248420	176645
E9PHM2	0	50218
E9PK52	604895	419070
E9PIE4	43981	97667.5
E9PIM6	2741800	1940400
E9PIT3	467335	4767700
E9PJ95	238360	160501
E9PJD9	10443450	8012150
E9PMI6	135292	136056
E9PK54	641430	577700
H7BXH2	62749	59866
E9PKG1	3903500	2878900
E9PN51	188140	207300
E9PKK8	240590	464620
E9PKZ0	8523850	5147900
E9PN91	513335	361415
E9PLD0	4565850	3434100
E9PLK3	1618935	2306200
I3L3B4	66313.5	244985
E9PLP8	0	0
E9PMA4	422170	0
H0YDB2	0	311535
E9PPG9	172966	148730
E9PPI9	247025	0
E9PQI8	305980	78425
E9PR30	2671200	1947350
E9PR44	87639	16967500
E9PS97	2179400	1113475
E9PSG0	131660	489825
F2Z2T1	161025	177365
F2Z2Y4	1550650	1233385
F2Z388	2992250	2483200
F2Z393	1024175	1737350
G5E9V2	41412.5	0
F5GWX2	139086	0
F5GX77	775630	371755
F5GXJ9	331365	622215
F5GYN4	1483550	1469950
F5GYX3	779280	0
F5GZQ3	2823600	12740500
F5GZS6	94337.5	233520
F5H0N4	0	0
F5H2F4	6106700	3649150
F5H4C6	303735	262660
F8VY35	12534000	6748000
F5H5D3	2889050	3099350
H0Y8R1	321440	206950
F5H669	325890	221800
F5H6E2	480295	629085
F5H7F6	223490	1438300
F5H6X6	15877500	17476000
F6RFD5	4197550	5409050
F6T1Q0	109376	0
I3L3Q4	90815.5	0
F8SNU7	73455	60769
F8VPD4	1324935	1019040
F8VQE1	6713350	5597050
F8VQR7	0	344565
F8VR82	618385	704720
F8VR84	157435	0
F8VUA2	232810	0
F8W651	2013400	1674750
F8VVL1	560435	784950
F8VWH9	1215850	505000
F8VXU5	433010	465910
F8VYY9	273965	433120
F8VZX2	450910	0
F8W031	1333510	3330250
F8W1A4	2214900	3712450
F8W726	4703400	1113020
F8W7C6	0	0
F8W930	592795	827340
F8WAE5	990475	513690
F8WBH7	275145	187355
F8WBJ6	0	0
F8WBW6	0	160835
F8WCF6	3544900	3172100
F8WJN3	2036400	1304635
G3V0E4	299665	377840
G3V0I5	208040	283565
G3V1D1	2483550	4310150
G3V1C3	588425	417880
H0YI92	0	0
G3V203	9974600	11256500
G3V2K7	493905	503155
G3V2N3	212030	0
G3V576	14136500	4926000
G3V325	381995	588380
G3V5R3	278115	142325
G3V4F7	338935	0
G3V4Y7	96245	506640
G3V529	0	103253
G3V5Z7	4286650	3969850
G3XAI2	3279750	6655300
G3XAM7	1091550	1092160
G3XAN8	0	65734
G3XAP6	0	1641000
G5E9Q6	3786250	2913650
G5E9W7	456930	338323
G5EA09	612830	441870
G8JLA2	509895	371295
G8JLB6	26808000	11253900
G8JLD5	1589750	1929500
H0YD13	2857750	663575
H0Y4T6	132850	0
H0Y641	0	130490
H0Y4Y4	47749	0
H0Y6E7	3264350	2483950
P0DP25	16861500	19769000
H0Y8E6	1246000	552380
H0YA96	9045350	6493100
H0Y9M9	77613.5	83898
H0Y8X4	429925	143030
H0YAC8	179655	0
H0YAS9	152320	308095
H0YDP7	260370	0
H0YDU8	395205	294305
H0YFD6	5169250	23396000
H0YG54	1576250	1221395
H0YGW7	451530	319485
H0YH80	1237300	0
H0YIB4	337840	0
H0YKJ4	150380	832760
H0YLP6	4759250	4369900
H0YKS8	0	3291100
H3BQA8	158245	108458
H0YLC2	3544600	2846900
H0YLA2	1476200	915870
H0YN26	4917150	297980
H0YNH8	311820	152718
H0YNJ9	0	0
H3BLU7	1216875	2328050
H3BLV9	0	782250
H3BR08	0	375350
H3BRI8	93955	66458.5
H3BMH2	2358000	2485200
H3BMM5	679855	845355
H3BV80	574070	0
H3BMQ2	0	0
Q86WV2	483795	501790
H3BNC9	12422500	10173850
H3BNK3	381890	514640
H3BP42	0	285965
H3BQ23	172418	0
H3BR35	1816600	1027495
H3BRL3	0	0
H3BRU6	6541450	3781450
H3BTI0	0	283225
H3BTN5	160775	399280
H3BTW5	1223800	828665
H7BXY5	0	2134750
H7BYH4	364645	0
H7BZJ3	7977700	5858100
H7BZW6	147635	86704
H7C003	1187100	739330
H7C053	119014	95015.5
H7C0P8	772010	898115
H7C2Q8	63465	0
H7C3P7	785585	222680
H7C4F9	345355	499350
H7C4T5	689760	295345
H7C5G8	131420	0
M0R2V8	619025	0
I1E4Y6	863930	400745
I3L0A0	1674535	916995
I3L0H8	853540	873260
I3L0N3	359425	235021
I3L297	949925	1259875
I3L2B0	217480	0
I3L3Z3	440890	187630
I3L3H2	1521000	1446055
I3L3P7	1921100	1305900
I3L4N8	100496	468915
J3KMX5	3522850	2661150
J3KN16	220990	212575
J3KN67	228045	281890
J3KNF8	316895	0
J3QL05	2273650	283390
J3KPX7	512132	1540900
J3KQ32	668790	645940
J3KQ61	352370	411510
J3KQL8	0	191690
J3KRJ9	1020910	60795
J3KRN5	127850	109732
J3KS22	61355	407745
K7ESE8	0	526555
J3KTA4	14494000	5553550
J3QR09	4645950	188295
J3KTF8	8486850	7547550
J3KTL2	7402850	251520
J3QK89	217669	0
J3QLE5	726160	424895
J3QLI9	2570300	2165300
J3QRS3	29339500	40631500
J3QRS9	455725	0
J3QSU6	2457450	4949000
J3QSV6	593690	810985
J3QT28	1838900	976080
K7EM02	2320500	1413790
K7EJ78	4086450	3882250
K7ES75	0	227585
K7EJE8	949065	1627700
K7EK07	11197300	15624000
K7EQ02	1656950	599830
K7EKL3	726550	2536200
K7EKP8	399630	305900
K7ELG9	828755	497345
K7ELI9	0	599025
K7ELL7	15116500	16310500
K7EM11	0	0
K7EM18	594960	529810
K7EM38	838360	3356800
K7ENH2	2452200	1791650
K7EP46	262390	258052
K7EPK5	367555	227180
K7ES61	0	0
M0QX71	820225	343415
M0QXB4	4133200	2972150
M0QY80	74266	309205
M0QXF7	3082900	4186050
M0R299	1325350	1368400
M0QXU7	280920	0
M0R1S0	179710	180410
M0QZL6	0	506940
M0QZM1	62067	72058
M0QZS6	1080935	0
M0R0F0	9313000	7231450
M0R0Y2	822715	963850
M0R3D6	4633350	4133750
M0R221	2172500	1732250
M0R389	220197	0
O00148	637425	0
O00151	4200650	9426850
O00203	278955	183415
O00231	1078630	1471300
O00232	1228735	700545
O00264	5263150	5516700
O00273	507885	414855
O00299	39518000	16117500
O00303	2757250	1760800
O00410	10660450	8814950
O00425	194545	262440
O00469	6429000	5798800
O00483	496060	0
O00487	2364200	2006450
O00499	1428535	1107050
O00505	2579450	1679100
O00567	211142	364130
O00629	1528550	1252390
O14556	0	0
O14558	4462500	10864400
P47813	479570	367795
O14737	873170	708875
O14744	713255	693760
O14787	84391	124370
O14818	5960750	2914800
O14929	322780	131121
O14933	0	0
O14974	3055200	1533010
O14980	1662550	1940250
O15067	1198145	207380
O15144	5501300	4499100
O15145	3282800	3113000
O15173	201725	903205
O15212	582925	400860
Q5T8U5	74810	48461
O15355	567820	0
O15371	4032300	424910
O15460	8238200	6054850
O15511	2407550	1913100
O43143	362730	286680
O43172	0	0
O43181	402000	367120
O43237	1567800	1240800
O43242	610255	608350
O43252	1042765	630240
O43294	2078950	1307300
O43390	3853650	1121925
O43395	172152	163506
O43396	4670500	2144950
O43447	649965	283870
O43592	501270	491770
O43678	215290	210960
O43681	1415620	1643650
O43707	30252500	41294500
O43747	296355	199330
O43765	964495	602015
O43776	1984450	2814150
O43809	547995	150923
O43818	218485	94798.5
O43852	11562400	12226250
O43920	0	0
O60493	2330750	1248125
O60506	18238500	12398100
O60568	1071295	1907800
O60664	24445500	10246900
O60684	672005	703315
O60701	19512500	9293350
O60711	594340	100842
O60763	1651850	1463105
U3KQK0	65484500	35084000
O60869	905360	1005250
O60884	968015	664220
O60888	3220950	1697650
O75083	17238500	17577500
O75131	693875	2474350
O75340	776440	1487250
O75348	0	0
O75351	307005	0
O75367	1587350	2483650
O75368	1685400	1835900
O75369	19515000	12716650
O75380	69220	0
O75391	0	0
O75396	291255	656655
O75489	699410	990650
Q5JRI1	1171960	0
O75506	193990	121945
Q5TDI7	2355800	0
O75531	5542300	3114450
O75533	1063460	1098180
O75534	2240100	918710
O75569	246275	510365
O75607	497365	0
O75643	940150	426770
O75663	0	0
O75821	1919800	1231150
O75822	1510850	1253915
O75874	4455600	8258450
O75934	0	0
O75937	491900	0
O75947	19220500	22071500
O76003	5418200	3490150
O76031	568585	748630
O76071	176635	0
O76094	2509400	2126750
O94760	171615	211820
O94776	430190	343865
O94826	599240	791640
O94925	1863800	5276100
O95182	0	68378.5
O95302	2857650	3298100
O95336	2760350	3269250
O95340	5022950	1518870
Q5QPQ1	0	0
O95373	4640100	3804000
O95394	593110	0
Q5H8X8	5967500	10954400
O95433	3488650	2136600
R4GMU1	271225	1817100
O95671	0	212895
O95782	2063750	2040550
O95816	1228195	1944000
O95817	272505	0
O95831	570865	784140
O95881	1542950	1711200
O96008	0	736415
O96019	642355	376335
P00167	1142180	7212000
V9HW50	0	1057775
P00338	43113000	72133500
P00367	4451250	11826500
P00387	354490	986295
P00390	1276740	5429150
P00450	2718800	2480100
P00491	982220	916840
P00492	899735	549905
P00505	953095	647970
P00558	35321000	52557500
Q5T9B7	674045	466545
P00738	29267000	20847000
P00747	3253350	6942300
P00966	346630	1473800
P01008	416335	396755
P01011	737415	322645
P01023	32648000	49652500
P01024	26668500	29197500
Q5H9A7	575705	2158500
P01042	1939950	2559300
P01344	0	1501650
P0DP04	274620	46387
P01834	47963000	35056500
P02452	35672500	11980500
P02461	13048500	4525350
P02545	89505000	83983500
P02647	42247500	42115500
P02649	559315	5598150
V9GYM3	7879650	6205500
P02671	18921500	16835500
P02675	52299000	43431500
P02679	42705500	44357500
P02743	5241750	6330150
P02747	464095	783380
P02749	2159050	1935650
P02751	581965000	133455000
P02763	676110	616805
P02775	642955	5552150
P02786	420785	626470
P02787	72990000	48072500
P02790	6320300	5106150
P02792	1853650	2227000
P04003	164460	250190
P04004	14953000	47007500
P04040	1824820	4213450
P04075	53813000	42769500
P04080	2808900	4020500
P04083	43492000	25615500
P04114	1399600	1193810
P04179	2108600	9450200
P04181	3201650	3653550
P04217	1038105	513555
P04264	125630000	146665000
P04350	0	0
P04406	106329000	104918000
P04792	28908500	62092000
P04818	147855	0
P04843	242003	810100
Q5JYR7	0	320395
P04899	1458500	797690
P05023	115738	171633
P05091	1053250	6212500
P05121	213655	151555
P05141	1092155	2387100
P05186	532750	23881.5
P05198	3073800	2987900
P05386	31797500	14117500
P05387	25159500	13830500
P05388	17175500	6493350
S4R371	433760	921840
P05455	3373550	3215150
P05546	425375	3477150
P05556	1886500	3110700
P05783	61499	164390
P05976	4837200	0
P06576	46097000	80361500
P06703	9309500	4651900
P06733	144240000	133555000
P06737	1008065	1658800
P06748	35738000	13452150
P06756	1276450	7407550
Q8N257	8614300	0
P07195	26685000	32382500
P07237	85878500	93265500
P07305	360050	510420
P07355	123170000	123143500
P07384	734515	648110
Q5JP53	56465500	47172500
P07585	1766450	569705
Q5URX0	1115830	1792150
P07711	1388100	1757700
P07737	85460000	46298500
P07741	5200250	5113100
P07814	6436400	6951750
P07858	16709500	32244000
P07900	97455000	80868000
P07954	1847400	1862250
P07996	5813900	17566000
P08133	23229500	45813500
Q5JR08	4451650	1814850
P08238	56764000	45744000
P08240	224785	0
P08243	0	41575
P08253	558975	904410
P08473	0	5737300
P08493	0	3076350
P08559	1097435	730240
P08567	587890	2129350
P08574	0	905295
P08603	1513250	2124500
P08621	1851250	1064160
P08648	2613300	3833850
P08670	709235000	530345000
P08758	46915000	78568000
P09104	6041150	7409085
P09211	26104500	27362000
P09382	150030000	126525000
Q5T7C4	3538600	0
P09486	8745950	4973950
P09525	860450	2493950
P09622	2184650	3581050
P09651	25593000	16134450
P09661	809735	645360
P09874	1401600	1123730
P09936	13106000	4554300
P09960	1098490	1747500
P09972	1937550	2028050
Q6ICJ4	145139	116184
P0DN76	3764450	675815
P0DN79	0	0
P10316	670800	2375650
P10412	345820	217215
P10515	707170	3226250
P10599	6257700	6163300
P10606	527320	828655
X6R5C5	1193200	1533150
P10644	1653350	1456000
P10768	6457950	5599400
P10809	48661000	65360500
P10909	5097650	6304800
P11021	113156500	141455000
P11047	4583650	13036000
P11142	154865000	123055000
P11177	1708050	1702200
P11216	699535	1246400
P11279	1930750	3616850
P11387	873735	986290
P11413	5920350	14012000
P11766	6745800	8273950
P11940	19515000	12995600
P12004	7112400	2535600
P12081	2310700	714765
P12110	25154500	18506000
P12111	39032500	47301000
P12236	172316	277660
P12268	6699450	3801650
P12270	3162650	1519580
P12814	73794000	121348000
P12955	783065	1510650
P12956	8687950	6068200
P13010	9027150	7514100
P13489	23477000	17563000
P13611	2038450	1825250
P13639	125960000	85114500
P13667	30802500	34135000
P13674	10789150	14466000
P13804	3891850	5514550
P13807	291790	534830
P13861	1406650	1617000
P14174	9058100	10471100
P14324	2417550	2620200
P14384	0	612090
P14543	108832	628225
P14550	1638915	1658650
P14618	180405000	152895000
P14625	100454500	149435000
P14854	1030945	0
P14868	1755500	1877550
P14923	230130	275545
P14927	1664850	2043700
P15090	0	57210500
P15121	2092850	2948200
P15144	12456450	38318000
P15374	840965	432795
P15531	3164150	1455760
P15880	16208000	13223100
Q5TEJ0	678255	532515
P15954	0	0
Q8IUE6	24090000	19238500
P16152	6083500	5129400
P16401	10327000	8892800
P16402	789290	359275
P16403	21407500	14574500
P16930	601710	619820
P16989	6021200	5167750
P17066	14083500	12621300
P17096	819125	177478
P17174	1053280	1058785
P17655	9661000	6696550
P17858	682260	1298300
P17900	129842	302180
P17931	2483950	1664510
P17987	12067150	11700350
P18077	1550150	0
P18084	0	1434250
P18085	14984500	9957350
P18124	20112500	20377000
P18206	37245000	50973000
P18669	21646000	17901500
P18754	1163675	857680
P19338	41754500	10764500
P19367	413140	1139400
P19387	0	0
P19525	652630	635970
P19623	4347050	4720350
P19827	47494	447570
P20042	919045	610180
P20073	421865	0
P20290	2784050	756730
P20340	2658950	1821825
P20618	1802050	1331825
P20674	1132600	1339830
P20700	4792500	2732900
P20851	30331.5	73764
P20908	550905	329385
P21266	766550	2592250
P21281	625920	1461800
P21291	4014650	11187900
Q60FE5	211290000	409175000
P21399	555600	1396650
P21589	4049600	4951300
P21695	81361.5	2372000
P21796	25328000	41221000
P21810	2654050	0
P21912	678295	1012150
P21980	499315	14011000
P22102	3842750	1713840
P22234	6773050	5364900
P22307	1186120	1289355
P22314	40143000	34415000
P22626	39085000	24971000
P22695	272995	1109420
P23141	0	1576250
P23142	2965550	0
P23246	12349000	6966800
Q9NRH3	108142	64348
P23284	10461750	7616450
P23381	4111550	3462650
P23396	16123000	11329550
P23526	5917000	7731900
P23528	64109000	39261500
P23921	699615	346755
P24534	24977500	17799500
P24539	163880	461210
P24666	671995	332785
P24752	2062500	2238750
P24821	117299500	192750000
P24844	1586375	4185500
P25205	2390450	0
P25311	0	226675
P25325	0	389730
P25398	26982000	20639500
P25445	143049	367400
P25685	139485	70830
P25705	26547500	57481000
P25786	3190750	2965900
P25788	3867450	3956100
P26022	0	420355
P26038	29231000	25444500
P26196	782175	539745
P26368	2917050	621610
P26373	11678800	8803500
P26639	4207000	3432800
P26640	2192700	2611950
P26641	21046500	22325000
P27105	0	218465
P27348	15717000	12264450
X1WI28	7264500	6414400
P27658	0	868985
P27694	385660	0
P27695	3407900	2737550
P27797	66035000	61019500
P27824	1093125	2838550
P28066	6434850	4764050
P28070	2081400	1653770
P28072	1466000	1664900
P28074	749295	512460
P28300	2603550	657665
P28482	352455	124755
P28838	2158800	2058600
Q5VZU9	442130	721265
P29373	4870450	0
P29401	15763500	27385500
P29590	1667900	1392300
P29692	27186500	16926000
P29966	14204500	5836800
P30040	6160750	7543100
P30041	17781000	20751000
P30044	9725300	11381500
P30048	5174450	8349600
P30049	1085850	1949250
P30050	12141900	9288950
P30084	3940900	5947600
P30085	2145750	4122850
P30086	11202000	11956200
P30101	96631000	91445500
P30153	10533650	9871250
P30405	359935	1115665
P30419	81132.5	289780
P30520	411855	283760
P30533	521375	2449050
P30837	2791150	2419200
P31146	48613	68701
P31150	931030	1710450
P31153	2399300	694900
P31689	1690250	881425
P31930	4500050	6499600
P31937	224400	348875
P31939	11406600	9740600
P31942	4044950	2743900
P31946	8023950	5440050
P31948	8122150	7378050
P31949	7721950	19348500
P32119	5392400	6580300
P32969	12385500	11827500
P33176	2983950	2983400
P33316	2516300	1384640
P33993	813010	289790
P34896	49470.5	96647
P34897	5224700	3537500
P34932	14349500	11160350
P35052	251385	305380
P35232	4939850	7025000
P35237	439840	382640
P35244	1073665	541210
P35268	1761690	1923300
P35555	395565	571865
P35579	150315000	285955000
P35580	2120900	4959150
P35606	4615450	3683900
P35637	9681900	3513350
P35749	0	2102750
P35754	1102305	1978600
P35998	3555000	3000650
P36269	0	493170
P36507	649300	506025
P36542	750015	1902965
P36551	0	388825
P36578	48089500	35228500
P36957	1606700	1561000
P37198	822510	418440
P84074	129471	0
P37802	46483000	33149000
P38117	2017850	1490205
P38606	1000535	1042490
P38646	26485500	28376000
P38936	78758	210525
P39019	5238950	4823400
P39023	18128000	13712500
P39748	2013650	681365
P40121	1819650	0
P40222	989145	958820
P40227	15026500	13658500
P40261	15341000	61592000
P40429	9356000	9279250
P40763	415100	1181600
P40925	5558850	6929250
P40926	16477000	28267000
P41091	4765350	5396300
P41223	0	0
P41250	12918000	9854250
P41252	1673700	1890530
P42166	753430	281475
P42224	2578800	4088350
P42285	296300	91787.5
P42574	0	0
P42704	1877705	2969600
P43034	533890	930240
P43246	227080	250225
P43490	1982450	5636100
P43686	4064400	3186600
P43897	363000	526920
P45954	0	89821.5
P45974	4784400	3535600
P46060	3799150	466535
P46087	211410	0
P46109	391160	480680
P46778	7386400	5254000
P46783	2722400	1489785
P46821	17127000	17177500
P46937	416000	279870
P46940	15099000	12324750
P47756	11886000	11529050
P47897	3044450	2378300
P47985	448610	655435
P48047	1884550	1712405
P48163	0	1119750
R4GMR5	1128820	1125375
P48637	1842350	1494750
P48643	17806000	14761000
P48681	15135500	342625
P48735	1062405	3149500
P49006	0	243810
P49189	642295	1719500
P49207	3765150	3776350
P49321	3283750	1356860
P49368	11638900	10699100
P49411	8951150	11330950
P49458	1854950	1470435
P49588	5774550	3547550
Q5T5C7	2046800	1337550
P49721	2631850	2274300
P49748	1053745	5785000
P49756	695975	145742
P49790	0	0
P49792	367840	209001
P49915	4203600	776810
P50213	1209145	2076700
P50395	22033000	22728000
Q5HY57	581230	459035
P50454	105323000	75880500
P50479	1804700	1702550
P50502	5629100	3930650
P50552	3251650	701675
P50579	1845550	885340
P50990	16923000	15831000
P50991	9812350	10631800
P50995	1178555	1143620
P51148	634060	388480
P51149	1819900	2217250
P51570	338555	0
P51665	255950	124590
P51857	0	1934850
P51858	1039785	617560
P51884	10405750	1309440
P51970	492075	508330
P51991	18305000	10816350
P52209	6146200	18699000
P52272	12137550	7169350
P52292	2809450	635755
P52294	431765	349795
P52597	8198800	4884400
P52788	408950	161068
P52815	1308600	894420
P52895	0	132650
P52907	9141050	7639250
P53004	555630	607955
P53396	17375500	31175000
P53582	156633	117925
P53597	919240	1765100
P53618	3167800	3010900
P53634	524380	417725
P53999	6285400	0
P54136	3465700	4631250
P54577	3121050	2343250
P54652	79183.5	1301250
P54687	2558100	451170
P54727	6294650	3388650
P54886	776555	1987850
P55010	1103650	210211
P55036	3390100	1716355
P55060	33202000	23528500
P55072	65761000	48639500
P55263	670095	368360
P55290	0	311260
P55735	8905150	5814900
P55795	1080270	0
P55809	857000	706970
P55884	5536350	3965650
P55957	367555	443720
P56192	705970	767580
P56385	0	661060
P56537	6266100	4530800
P60059	460795	390355
P60174	44578000	56061000
P60228	2135150	972295
P60660	49183000	54895500
P60709	53309000	79615000
P60842	30498000	25870000
P60866	3870000	2518250
P60903	7399750	4611600
P60953	2190500	1207445
P60983	1084930	1964600
P61019	708970	850755
P61026	191240	409090
P61081	737660	550480
P61086	1763350	1173860
P61088	3850400	2760400
P61158	15997000	16082500
P61160	5883150	5007750
R4GMT0	2873050	2988850
P61221	2525850	2285650
P61224	4820950	5281200
P61247	20204000	16526000
P61353	14745500	10248400
P61457	137096	0
P61586	2976950	1273930
P61604	9051400	12972000
P61758	718685	513445
P61769	108718	0
P61960	287675	46582.5
P61970	3746900	2992950
P61978	47855000	24929000
P61981	7588450	11114500
P62081	19302500	12576250
P62140	6561050	6356900
P62191	2955350	2081200
P62195	3466250	2366600
P62241	31322500	27546500
P62249	6589150	4279500
P62258	35816000	31363000
P62266	3357150	3096550
P62269	7058150	7656050
P62280	7428900	4736950
P62304	1130605	474070
P62306	1626850	1286275
P62310	351910	686910
P62316	3184000	2225600
P62318	2442900	2113800
P62328	4147950	16151000
P62330	289050	0
P62424	18827500	14371000
P62495	1465350	457170
P62633	584495	729420
P62701	15414500	11827800
P67775	1143640	157695
P68032	40672000	108639500
P62753	15544000	12545650
P62805	45700000	44808000
P62829	7782900	3866000
P62851	8213550	8412700
P62854	7059650	6404100
P62857	8618800	8833350
P62873	2334400	3205150
P62877	443485	303260
P62879	4475600	4531900
Q59GN2	1792550	1115640
P62899	9497000	8825750
P62906	4609300	5067800
P62913	6711750	5861900
P62937	68392000	61049500
Q1JUQ5	1800300	2044400
P62979	6175750	7120950
P62993	677620	644300
P62995	3874300	721015
P63010	3395500	4282900
P63104	31635500	22127000
P63151	1354880	1560980
P63167	1746000	558250
P63172	1505350	1006860
P63173	1337500	0
P63208	1725000	1660250
Q8WVC2	11970000	9103600
P63241	24199500	14103100
P63244	35688500	29738500
P63261	426765000	656705000
P63279	735930	479725
P63313	5945250	6453650
P67809	8947350	7240150
Q5SRQ3	602855	0
P67936	21721000	29887000
P68036	3774900	2336000
P68104	106572500	100072000
P68133	0	0
P68363	206960000	164895000
P68371	126171500	94560500
P68402	1045400	1025875
P68431	5761550	5612650
P68871	2386700	1145340
P78318	80579.5	117085
P78347	551840	382385
P78371	24127500	18645500
P78417	4096500	4880250
P78527	3499650	3123200
P80723	4987600	6807450
P81605	811155	0
P82675	220744	0
P82979	998320	567355
P84077	5116050	2226700
P84090	2872250	1855250
P98082	1419900	434110
P98095	498810	2902600
P98160	2338150	2177350
P98179	2139950	636215
Q00059	0	0
Q00577	0	397725
Q00688	1463450	2568300
Q00796	0	0
Q01085	990730	672580
Q01469	5218000	11593450
Q01518	41761500	29301000
Q01581	5648600	740960
Q01658	0	0
Q01813	4586300	5299350
Q01970	107256	0
Q01995	28525500	58640500
Q02218	1011350	2818800
Q02790	2607150	4395000
Q02809	4006450	4273350
Q02818	599350	1193600
Q02878	19259000	15100000
Q02952	278695	313860
Q03252	3348650	3019200
Q04446	1536750	3207500
Q04760	1172600	1122170
Q04828	101228	28822000
Q04837	2631000	1859750
Q04917	4609600	4211900
Q5T760	610230	0
Q06124	131322	249530
Q06210	2791150	1732850
Q06323	877900	202320
Q06830	37120000	35472000
Q07021	12351100	11204200
Q07065	13220050	26089500
Q07352	283645	0
Q07507	668160	186000
Q07666	1999050	925215
Q07812	449885	537600
Q07954	2901350	3627700
Q07960	4647750	5319600
Q08211	4475350	3697350
Q08378	245490	175760
Q08623	717290	581120
Q08752	230220	0
Q08945	2009200	246826
Q08J23	1283900	540375
Q09028	2841800	1095075
Q09666	146995000	68543000
Q0VF96	593210	618585
Q10472	0	533755
Q10713	335050	318865
Q12765	1713050	1395045
Q12792	1017405	1494200
Q12797	737835	860975
Q12841	0	1155730
Q12874	2079550	820425
Q12904	5781100	3664050
Q12906	8493450	5344650
Q12931	364540	442160
Q13011	674765	2105400
Q13045	527190	327756
Q13085	314365	0
Q13148	4207100	2720600
Q13151	5839450	3003200
Q13158	63541.5	95184.5
Q13162	11722000	11646950
Q13177	1101450	597380
Q13185	4954450	2620600
Q13200	8304350	4861600
Q13217	873480	1216185
Q13243	322125	0
Q13247	3986150	0
Q13257	185315	0
Q13263	5414150	4248450
Q13283	3577300	2007500
Q13347	2466150	944210
Q13409	3550050	3405950
Q13435	4102750	1846810
Q13451	279035	8388850
Q13492	596015	406315
Q13501	608650	424030
Q13509	4925900	3260200
Q13561	3015800	2381700
Q13595	1153500	347243
Q13596	785540	881780
Q13637	0	0
Q5JXH8	860570	8046150
Q13813	13855000	12801000
Q13838	4834050	3380800
Q13885	1917450	2383100
Q13895	0	238024
Q14008	824080	0
Q14019	5584450	6102050
Q14137	278605	229600
Q14152	3478850	1416400
Q14166	1002290	635245
Q14195	20274500	8646250
Q14204	14993500	15003000
Q14240	208680	293690
Q14247	7721550	2870200
Q14257	1525405	2615200
Q14315	41830000	30803500
Q14444	4512700	2004600
Q14566	1522750	582550
Q14677	761640	224540
Q14692	147932	0
Q14694	934085	123546
Q14696	929030	1233470
Q14764	20948000	19076500
Q14847	3612950	4529750
Q14974	12788000	6468100
Q15008	1406100	1455605
Q15019	11320750	9338900
Q15029	2745200	2768250
Q15046	2375150	2174850
Q15050	1096415	859625
Q15056	8206850	6552350
Q15067	0	3224.65
Q15084	32661000	31453500
Q15121	5545100	4832800
Q15149	24409000	29895000
Q15181	3030500	2800900
Q15233	5991550	3674750
Q15274	712410	1122750
Q15293	10281150	13911500
Q15365	17547500	8476550
Q15370	62425	77825
Q15388	156746	0
Q15393	1218590	800550
Q15397	0	0
Q15404	2374450	1605400
Q15417	11866500	9714700
Q15424	1034445	796975
Q15427	1025070	755745
Q15436	5352050	3215000
Q15459	4041250	1905400
Q15582	26960000	36126500
Q15631	0	422910
Q15637	1155100	822540
Q15654	339235	300486
Q15691	3558000	2103300
Q15717	3686300	2871500
Q15746	0	221170
Q15785	194415	147870
Q15942	5855050	6022600
Q16186	1402900	1034375
Q16204	574445	590560
Q16222	2564450	1395075
Q16401	409980	46495.5
Q16531	1664350	1030945
Q16543	4640150	2208900
Q16643	18222500	8385800
Q16658	39459500	17497500
Q16666	1702950	797420
Q16698	643425	1977950
Q1KMD3	2034650	1695700
Q2NL82	189755	0
Q2TAM5	1604100	626615
Q2TAY7	218540	0
Q32MZ4	1503615	2293200
Q32P28	10568750	14677500
Q32Q12	13778250	8420600
Q3SY69	350195	1818200
Q3ZCM7	15234000	12130500
Q4G0F5	102770	380550
Q4G0P3	930300	1621550
Q4VC31	0	0
Q52LJ0	187773	163900
Q53FA7	61670	256465
Q562R1	139810	159485
Q58FF6	0	1926600
Q58FF8	4468250	4031600
Q5JQQ4	0	67776.5
Q5JRS1	0	22689
Q5JTH9	0	0
Q5JWM4	0	0
Q5LJA5	59845	0
Q5QJE6	0	0
Q5QPL9	0	0
Q5QPM7	1186700	826170
Q5T0R9	706325	392255
Q5T1H1	4740700	979540
Q5T6H7	796925	820455
Q5TCU3	37423000	43459500
Q5TEC6	3701100	3714000
Q6DKJ4	809150	677430
Q6NVY1	246835	400735
Q6NY19	419175	7259.45
Q6NZI2	15644000	9985400
Q6P2Q9	666820	675345
Q6UN15	137974	0
Q6YHK3	229790	7460
Q70UQ0	1664900	3051600
Q71DI3	1569450	2527900
Q71U36	9244550	7571850
Q7KZF4	15874000	17618000
Q7L1Q6	3660550	1443170
Q7L2H7	1509700	1061350
Q7RTV0	523090	0
Q7Z406	1955950	3715250
Q7Z434	0	471025
Q7Z6Z7	110978	203720
Q86U42	475470	190070
Q86UE4	638565	452405
Q86UX7	416040	2799200
Q86V81	2417000	1158055
Q86VH2	499900	697955
Q86VP6	3612650	4855500
Q86X55	941690	738095
Q8IVD9	27042	87843
Q8IVL6	3029050	614395
Q8IWE2	1884900	1062400
Q8IXM3	407870	271105
Q8IY81	0	140415
Q8IYD1	250245	217555
Q8IYL3	38712.5	0
Q8IYQ7	16389000	0
Q8N163	371160	384175
Q8N183	0	519855
Q8N1B4	0	0
Q8N1G4	891750	670800
Q8N392	166735	0
Q8N5N7	229755	221710
Q8N8S7	444205	1696050
Q8NB16	0	773185
Q8NBJ5	1573865	2476000
Q8NBS9	30515000	46733000
Q8NC51	4194500	3945250
Q8NCA5	0	298378
Q8NCM8	196140	0
Q8NCW5	0	718830
Q8NEJ9	146712	81235
Q8NFG4	155050	125780
Q8NFH3	334205	250730
Q8NFH4	459255	308585
Q8NFH5	207700	188915
Q8NI22	206030	186585
Q8TBQ9	0	0
Q8TEX9	925335	471720
Q9NP97	618210	1008150
Q8WU90	177140	0
Q8WUM0	78079.5	66790
Q8WUM4	4996400	3794400
Q8WUW1	233435	0
Q8WVJ2	0	83615
Q8WW59	83411.5	139095
Q8WX93	12469500	12648000
Q8WXF1	1205440	240302
Q8WXX5	270725	121676
Q8WYP5	0	0
Q92499	6547250	5468600
Q92597	1643750	2069600
Q92598	7713950	4109300
Q92616	1327880	1244510
Q92626	356200	710280
Q92688	1136920	0
Q92743	1031025	28761000
Q92804	328920	171046
Q92882	454460	346750
Q92900	307345	473590
Q92945	8749700	4157400
Q92973	1331445	1013500
Q93008	61258	56144.5
Q93009	551205	0
Q969U7	14110.5	0
Q96A49	0	0
Q96A72	922340	1269050
Q96AG4	3214950	2413800
Q96AY3	5478500	4820200
Q96B49	682195	530475
Q96C90	775745	452515
Q96CX2	1284275	962120
Q96D15	28190000	21720000
Q96DG6	128710	460350
Q96DI7	159215	0
Q96EY1	132014	128526
Q96F24	0	14100.5
Q96FQ6	1361150	812575
Q96G03	321070	0
Q96HC4	2955150	5300450
Q96HE7	1101340	3309550
Q96HQ2	124018	56098
Q96HR8	115860	0
Q96HY6	158625	133648
Q96I24	196480	169315
Q96I25	251015	13703
Q96IJ6	691975	0
Q96IX5	356880	1672400
Q96J01	0	0
Q96KB5	171660	0
Q96KP4	5144400	3539650
Q96NY7	0	56911.5
Q96P70	701725	571660
Q96PK6	1167085	984685
Q96QK1	1282175	1797800
Q96QR8	321310	235670
Q96SI9	0	359580
Q96TA1	2378250	1061525
Q99426	1681650	896595
Q99436	1508700	1476900
Q99459	0	0
Q99471	1548050	896940
Q99497	20930000	20025000
Q99536	1392000	1563050
Q99538	1477150	761565
Q99541	1364200	1519450
Q99584	1533800	641630
Q99598	195045	227495
Q99614	504805	294455
Q99615	129470	340475
Q99674	0	0
Q99714	2562250	3902950
Q99733	5894300	3698900
Q99832	10446050	9699900
Q99961	3262200	1257710
Q9BPW8	0	117028
Q9BPX5	401005	270808
Q9BPZ3	179585	0
Q9BQG0	221800	159025
Q9BR76	915880	870875
Q9BRA2	2058150	3222050
Q9BS26	1001385	2890250
Q9BT78	2030650	1330525
Q9BTT0	2107950	0
Q9BUF5	88456500	61068000
Q9BV20	404805	109816
Q9BV57	834940	959420
Q9BV86	448870	245540
Q9BVG4	662305	352380
Q9BVJ6	160973	99040
Q9BVK6	553165	787405
Q9BVP2	616980	478385
Q9BWD1	3554250	2696150
Q9BWJ5	33948	91095
Q9BXP5	559690	0
Q9BXY0	172225	0
Q9BY32	272960	201740
Q9BYD2	0	0
Q9BZE4	0	0
Q9C005	257975	251135
Q9C099	860100	0
Q9C0C2	1246600	588915
Q9GZL7	645070	740580
Q9GZT3	523705	502760
Q9H0A0	205630	0
Q9H0D6	562180	722280
Q9H0S4	144496	106842
Q9H1I8	145050	130970
Q9H223	512865	0
Q9H299	13988000	6684000
Q9H2J4	0	0
Q9H3P7	1266500	1379400
Q9H444	0	767430
Q9H488	207785	346600
Q9H4A4	461920	763900
Q9H4G4	1504000	454440
Q9H773	522310	0
Q9H788	0	191295
Q9H939	0	21703.5
Q9H9J2	194218	160665
Q9HAV0	0	0
Q9HAV4	170615	167675
Q9HAV7	785925	1028735
Q9HB71	4898450	2959700
Q9HCN8	1112070	666295
Q9HCU0	487475	716385
Q9NP77	122566	0
Q9NPQ8	539280	228908
Q9NQ29	98534	36711.5
Q9NQ88	182670	283870
Q9NQG5	541045	309115
Q9NQR4	336830	405950
Q9NR12	4224300	4770500
Q9NR30	3413500	1450380
Q9NR31	3390000	2469400
Q9NR45	2515250	1776750
Q9NRX4	380135	503455
Q9NS69	793375	879445
Q9NSD9	1330170	1727700
Q9NSE4	0	610805
Q9NTZ6	115815	144365
Q9NUJ1	0	0
Q9NVI7	822770	855780
Q9NVP1	597740	378785
Q9NWM3	366555	1132345
Q9NX46	261220	392855
Q9NX58	154870	107927
Q9NXG2	0	0
Q9NY12	597250	702955
Q9NYL9	1919400	1318050
Q9NYU2	1254810	1688350
V9GYX7	211740	248335
Q9NZL9	0	39891.1
Q9NZN4	2744350	3352850
Q9NZU5	3627950	4181400
Q9NZZ3	0	229435
Q9P0J0	47043	0
Q9P0J7	0	120663
Q9P0K7	263945	612615
Q9P0S9	226660	629405
Q9P1F3	0	262360
Q9P258	186540	0
Q9P287	76670	69084.5
Q9P2J5	1246740	1756000
Q9UBB4	463935	323175
Q9UBG0	1074435	743225
Q9UBI6	797505	223860
Q9UBQ5	1470350	907445
U3KQ56	342290	574830
Q9UBR2	1598125	1748150
Q9UBS4	2949850	3153300
Q9UBV8	386435	289845
Q9UDY4	1838900	596525
Q9UG63	0	133070
Q9UGI8	268220	304430
Q9UHB7	0	295725
Q9UHB9	714480	797185
Q9UHD1	819815	0
Q9UHD8	5170850	5211550
Q9UHD9	40298.5	30228.5
Q9UHI6	0	112490
R4GMU5	0	275860
Q9UHV9	897260	520915
Q9UJZ1	3651400	7597450
Q9UKD2	222195	0
Q9UKN8	0	61230
Q9UKQ2	0	62303
Q9UKX7	244210	150340
Q9UKY7	823515	621085
Q9ULC4	581145	320247
Q9ULR0	96133.5	0
Q9ULV4	8435600	9602500
Q9ULX3	282270	0
Q9UMS4	2316600	2120800
Q9UMX0	1346000	1184170
Q9UN86	500865	294985
Q9UNM6	3188700	2611950
Q9UNS2	591260	767085
Q9UNZ2	2339050	1497920
Q9Y6W5	134498	0
Q9UQ35	1112230	0
Q9UQ80	10547650	7745450
Q9Y224	3747750	2268900
Q9Y230	3144850	3222800
Q9Y263	0	368895
Q9Y265	3995150	4657050
Q9Y266	3279950	1536100
Q9Y277	691290	1214200
Q9Y281	2879250	1046880
Q9Y285	615230	700170
Q9Y295	170995	0
Q9Y2Q5	169625	0
Q9Y2X3	672975	472795
Q9Y2Z0	2739950	1814850
Q9Y316	286380	231130
Q9Y333	350260	215840
Q9Y3B4	0	0
Q9Y3C4	0	130650
Q9Y3D6	26596	126110
Q9Y3D9	0	0
Q9Y3F4	5657850	3682550
Q9Y3I0	2681100	2335100
Q9Y3T9	276040	233875
Q9Y3U8	6443500	5729500
X6R700	0	0
Q9Y3Z3	130676	4321100
Q9Y490	99052000	107844000
Q9Y4E8	150929	235205
Q9Y4G6	116345	543820
Q9Y4K0	1242200	786765
Q9Y4Y9	937960	577475
Q9Y570	314395	398355
Q9Y5B9	882345	160978
Q9Y5L4	746165	1011995
Q9Y5P6	262435	26983
Q9Y5Z4	1075460	2009300
Q9Y617	960305	1386250
Q9Y676	423585	321305
Q9Y678	7108700	6962450
Q9Y696	16978000	9740250
Q9Y6A4	0	0
Q9Y6C2	5271350	3713650
Q9Y6Y8	327950	351795
R4GNH3	5751600	3929850
A2A3K4	1485120	3499250
E9PPH3	67473.5	144260
A0A087WWY3	28089500	0
H0Y5V0	0	418655
C9J8T0	8588950	0
E5RJD2	0	4312200
F8VZQ1	1738350	0
H7BZN3	3495450	0
H7C4M2	6854000	13733050
M0QY38	155560	98106
O60662	1548050	0
O94910	905705	0
P08473	9836050	15811500
Q03014	543430	0
Q2M243	7327700	0
Q6ZN04	1334300	893555
Q86YS3	745505	1478450
Q8WXI7	533655	1500800
S4R341	346600	0

## Sheet: Metabolites Lipids
	MSC0	MSC21
HMDB0003540	433.821	106.368
HMDB0006055	93.8229	233.648
HMDB0001173	37.5216	6.81073
HMDB0000034	9.89037	4.74783
HMDB0000050	105.154	37.2077
HMDB0000538	2410.47	5469.67
HMDB0000161	2770.4	2910.03
HMDB0000510	58.3731	30.5567
HMDB0000045	272.356	31.3475
HMDB0000052	7640.58	21.6025
HMDB0000168	13448.5	4959.56
HMDB0000191	29879	60950.5
HMDB0000043	268.04	305.938
HMDB0000062	31.2481	46.2369
HMDB0000097	1082.09	26020.5
HMDB0000089	7.66443	38.0042
HMDB0000082	222.969	127.056
HMDB0000630	1.80037	3.9505
HMDB0001440	645.268	245.978
HMDB0001058	240.85	270.333
HMDB0000124	1120.21	1228.36
HMDB0001586	1843.45	1268.48
HMDB0001401	1635.29	1312.74
HMDB0000148	51466.8	61094.6
HMDB0000641	47832.6	62671.4
HMDB0003337	1996.66	1169.8
HMDB0000123	27431	14243.4
HMDB0001397	72.4205	9.12455
HMDB0000132	135.42	201.634
HMDB0000133	16.0102	64.4363
HMDB0001273	380.707	86.0602
HMDB0001201	224.569	47.249
HMDB0000719	5899.45	4660.58
HMDB0000403	9.98913	52.8326
HMDB0000172	7355.42	6535.41
HMDB0000904	26.471	34.5984
HMDB0000099	140.62	0.7499
HMDB0000687	7355.42	6535.41
HMDB0000765	50.845	32.5401
HMDB0000696	2131.3	1863.85
HMDB0002931	144794	69842.9
HMDB0001406	66.5576	104.236
HMDB0000159	4058.05	3757.07
HMDB0000162	17325	15078.7
HMDB0000824	15.6606	21.3971
HMDB0001185	72.6822	18.5818
HMDB0000939	18.4911	23.2108
HMDB0000271	2739.63	2873.23
HMDB0000187	6353.52	5117.29
HMDB0000167	5890.94	4659.14
HMDB0000929	1086.14	975.449
HMDB0000158	4359.47	4070.21
HMDB0000883	305.908	325.26
HMDB0010382	136.897	119.199
HMDB0010384	217.276	240.344
HMDB0007995	709.258	5532.83
HMDB0007972	18036.5	13586
HMDB0007973	1881.62	1700.05
HMDB0008039	2643.18	3966.68
HMDB0008927	721.531	2619.62
HMDB0008994	2066.74	2210
HMDB0000252	14.0433	101.49
HMDB0005453	259.527	3582.4
HMDB0010479	187.017	110809
HMDB0010503	1	40.3878
HMDB0013704	77949.3	65751.5
HMDB0000895	6694.59	68055.8
HMDB0000201	60857.6	232151
HMDB0000097	456722	1.26549e+06
HMDB0000064	178459	2.00223e+06
HMDB0000157	157113	1.81917e+06
HMDB0000148	13386.1	118565
HMDB0014330	51726.6	56005.9
HMDB0000251	21551.5	235503
HMDB0032538	5788.91	13998.9
HMDB0000112	11000	101692
HMDB0000235	42572.3	58503.3
HMDB0000290	65056.8	24397.2
HMDB0004953	157000	4316000
HMDB0007170	714800	1487000
HMDB0011146	391500	249400
HMDB0010382	22500000	30940000
HMDB0010383	1863000	4718000
HMDB0010384	7345000	10400000
HMDB0002815	5671000	9244000
HMDB0010395	2011000	3919000
HMDB0011473	2860000	904000
HMDB0011129	1068000	499200
HMDB0011475	8517000	4007000
HMDB0011493	16820000	3320000
HMDB0011494	5431000	2401000
HMDB0011496	2283000	1955000
HMDB0008027	22690000	59860000
HMDB0007972	65250000	141000000
HMDB0008005	24820000	48840000
HMDB0008011	26430000	68080000
HMDB0007869	5849000	16160000
HMDB0007870	2561000	4264000
HMDB0000564	9208000	38210000
HMDB0007872	22430000	59230000
HMDB0007874	5832000	11350000
HMDB0007938	941200	4716000
HMDB0007881	4195000	5431000
HMDB0000593	28660000	71960000
HMDB0007921	9195000	13840000
HMDB0007889	6070000	14740000
HMDB0008020	2182000	3460000
HMDB0007988	6391000	13530000
HMDB0007989	4766000	13020000
HMDB0007991	1016000	5261000
HMDB0008055	1144000	4621000
HMDB0008057	436600	1930000
HMDB0008927	3642000	3313000
HMDB0011352	1640000	1693000
HMDB0011358	2252000	3563000
HMDB0011360	846500	1692000
HMDB0008993	2324000	1415000
HMDB0009003	2307000	1389000
HMDB0009059	1506000	1086000
HMDB0009069	1527000	1118000
HMDB0011457	908300	1869000
HMDB0008842	3112000	3044000
HMDB0008843	3657000	2153000
HMDB0008876	619900	232800
HMDB0009009	780600	611200
HMDB0009010	290200	203100
HMDB0009789	1762000	1367000
HMDB0009801	1622000	580300
HMDB0009813	1921000	1379000
HMDB0009815	19000000	12770000
HMDB0009819	2226000	1671000
HMDB0009824	3592000	2021000
HMDB0009844	5043000	3517000
HMDB0012357	6803000	3084000
HMDB0012368	1644000	673600
HMDB0012378	1789000	8923
HMDB0012383	3202000	791400
HMDB0112382	1648000	48520
HMDB0012390	6090000	1811000
HMDB0012335	1221000	1041000
HMDB0012378	1065000	2083
HMDB0012382	1844000	13030
HMDB0012097	3067000	4442000
HMDB0010169	18350000	54510000
HMDB0000548	6017000	13810000
HMDB0042089	266.5	4038000
HMDB0103535	2207000	8079000
HMDB0103548	1564000	6262000
HMDB0103626	1644000	6982000
HMDB0103926	4617000	16940000
HMDB0010411	9258000	35500000
HMDB0010412	6901000	95680000
HMDB0043855	10060	30340000
HMDB0044031	4519000	63820000
HMDB0005356	14030000	49860000
HMDB0005359	10820000	215000000
HMDB0104223	4956000	9838000
HMDB0005360	8995000	216800000
HMDB0043889	1080000	2006000
HMDB0005376	7756000	206300000
HMDB0005377	9587000	423500000
HMDB0005379	4813000	139200000
HMDB0048599	5457000	87250000
HMDB0005380	648400	64380000
HMDB0044079	117900	53110000
HMDB0044089	15060000	397100000
HMDB0044094	14310000	219500000
HMDB0044128	1790000	49990000
HMDB0044135	40850	58360000
HMDB0048421	341300	11040000
HMDB0048433	1	13170000
HMDB0047909	1213000	15900000
HMDB0005435	970500	39000000
HMDB0048597	35590	14400000
HMDB0048609	1706	7000000
HMDB0048609	5358	19560000
HMDB0062701	1638000	16670000
HMDB0108576	8274000	31000000
HMDB0108587	1698000	3605000
HMDB0044722	3777000	9682000
HMDB0044729	4498000	75810000
HMDB0005393	1847000	3709000
HMDB0044944	8066000	72240000
HMDB0062701	1495000	15900000
HMDB0049283	46240000	220900000
HMDB0049288	34820000	131300000
HMDB0049911	198800	5151000
HMDB0049294	4322	14170000
HMDB0049913	109200	16660000
HMDB0049899	66120	13780000
HMDB0049393	18760000	117100000
HMDB0005474	4520000	81270000
HMDB0049284	3137000	25030000
HMDB0072044	22120000	37970000
HMDB0072251	18750000	36800000
HMDB0011187	10540000	15210000
